# Supplementary material
Source: publisher figshare collection journal article supplement (https://gsapubs.figshare.com/ndownloader/files/22757270)
Supplement: Supplementary file 1 [file 22757270]

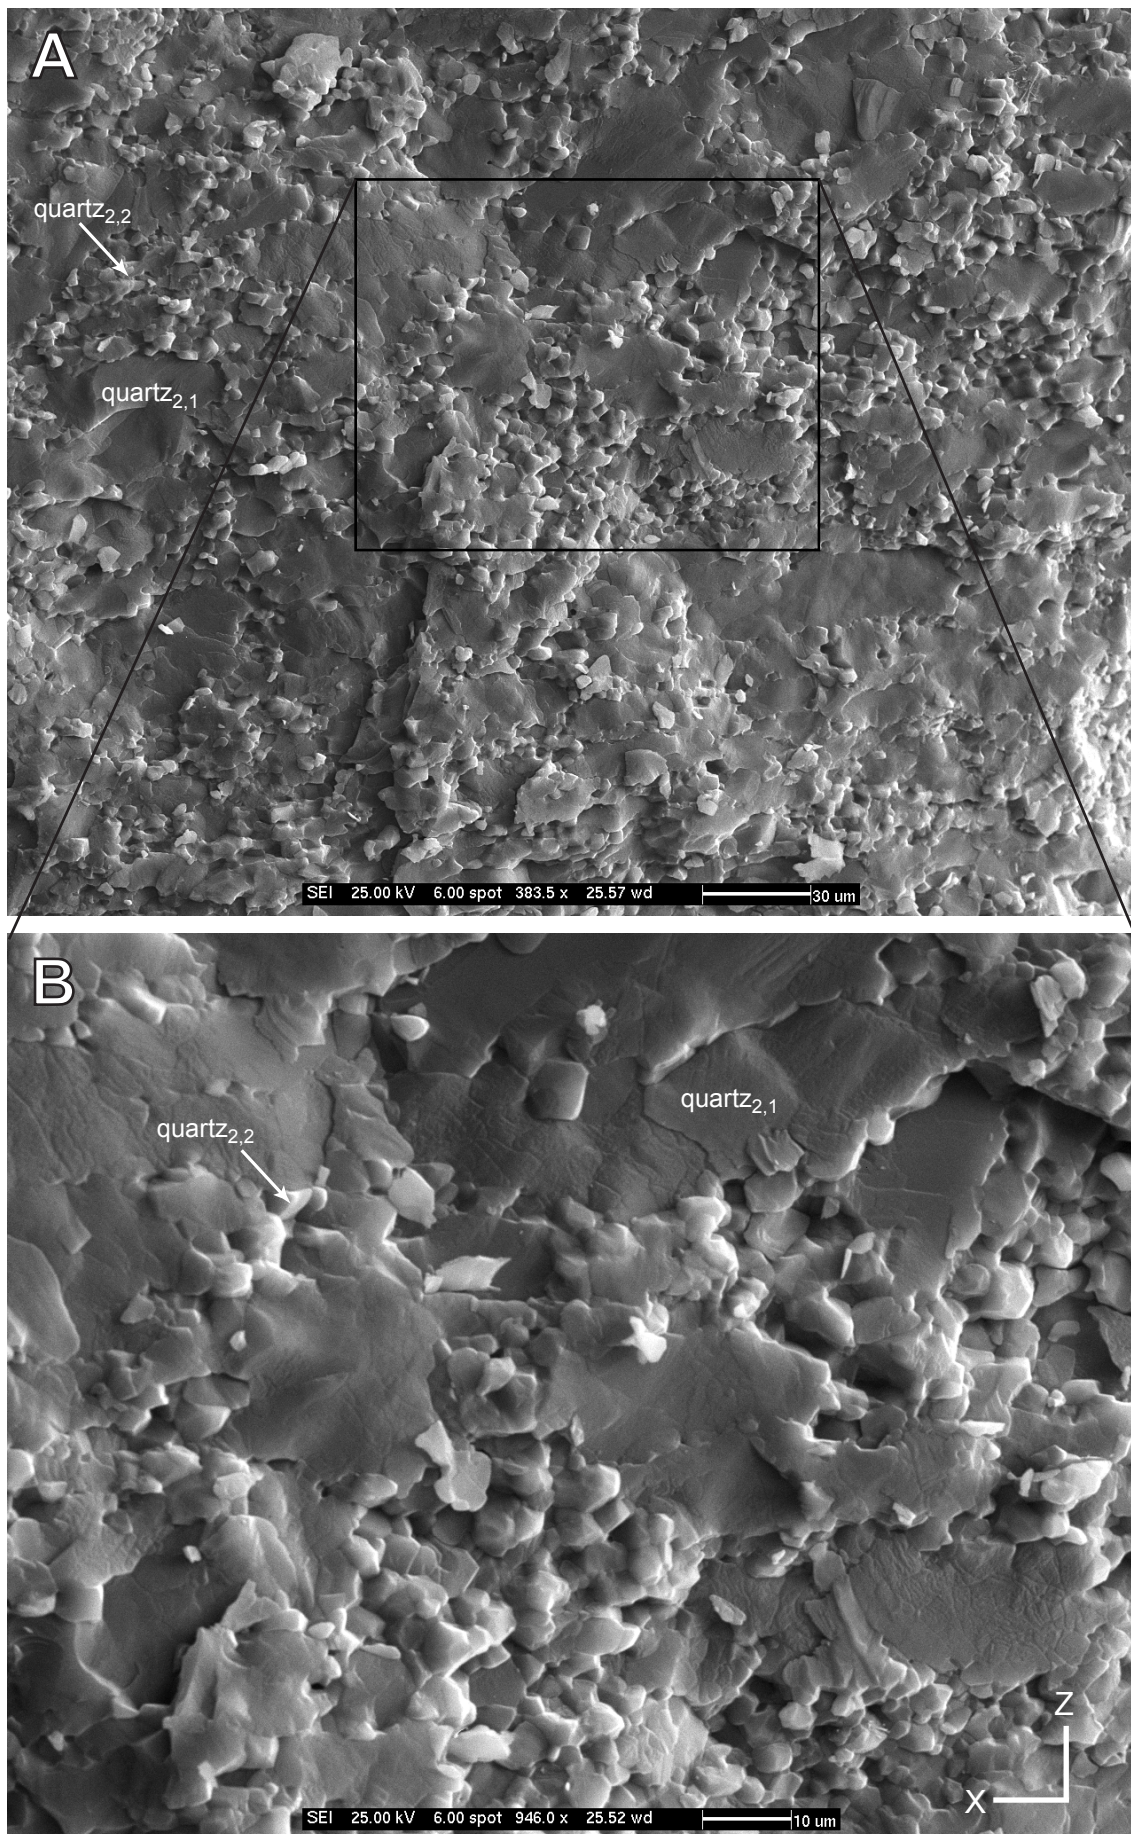

Appendix Figure DR1: Secondary electron SEM images of broken surfaces ca. perpendicular to foliation and parallel to lineation showing partial quartz<sub>2,2</sub> mantles around quartz<sub>2,1</sub>. B is an enlargement of the inset marked on A, showing detail of locally thick quartz<sub>2,2</sub> mantles.



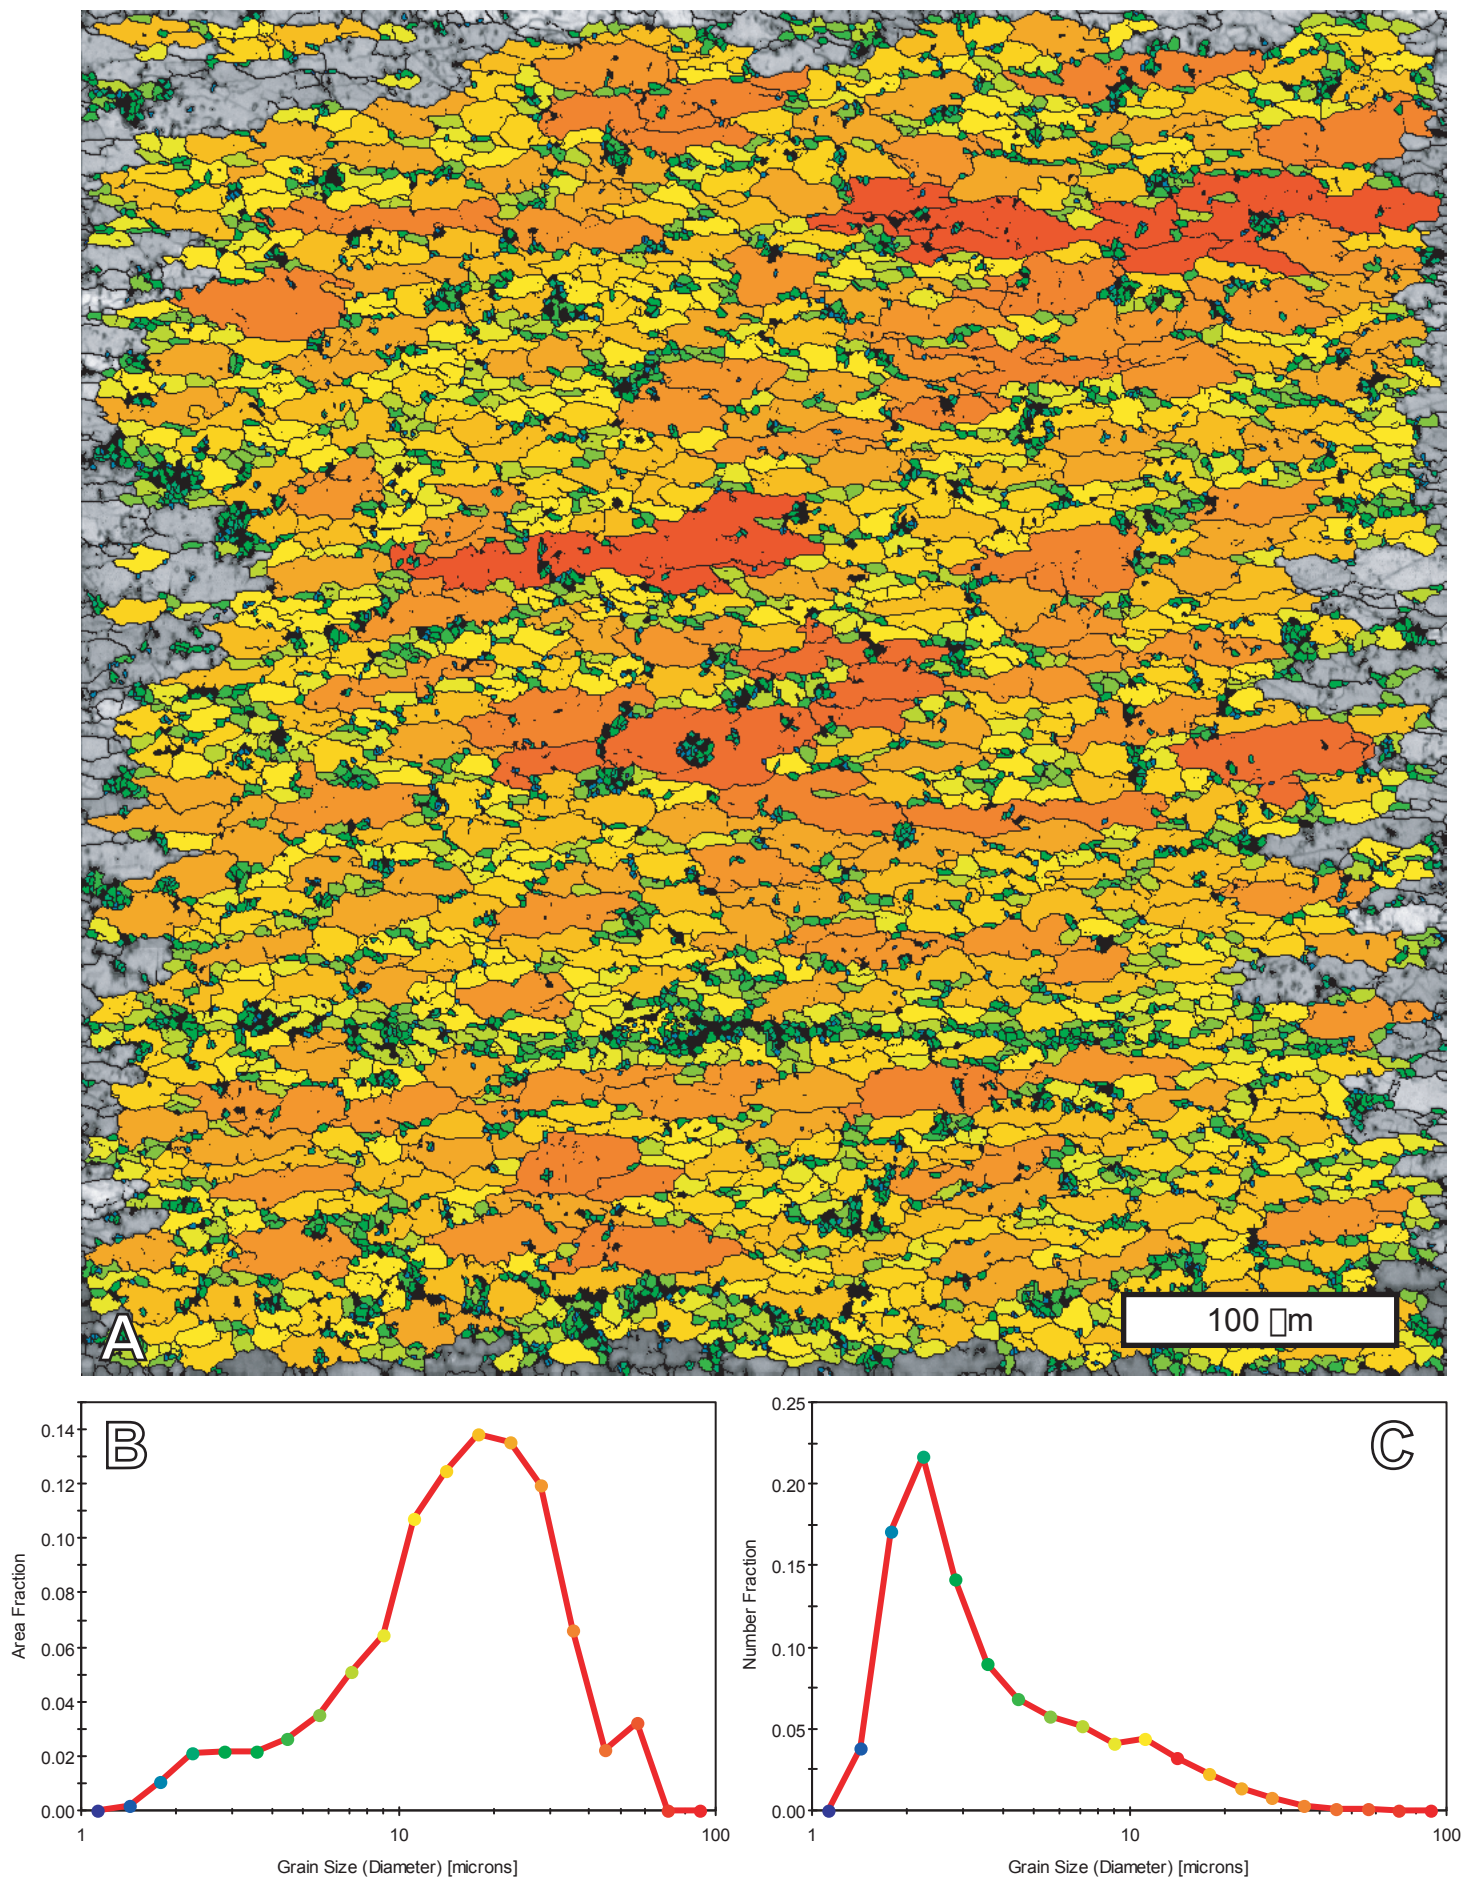

Appendix Figure DR2: A: EBSD derived grain map on an area of 500 x 500  $\mu\text{m}$  with 0.5  $\mu\text{m}$  steps. Color scheme is marked in grain size histograms: B: for area fraction, C: for number fraction.



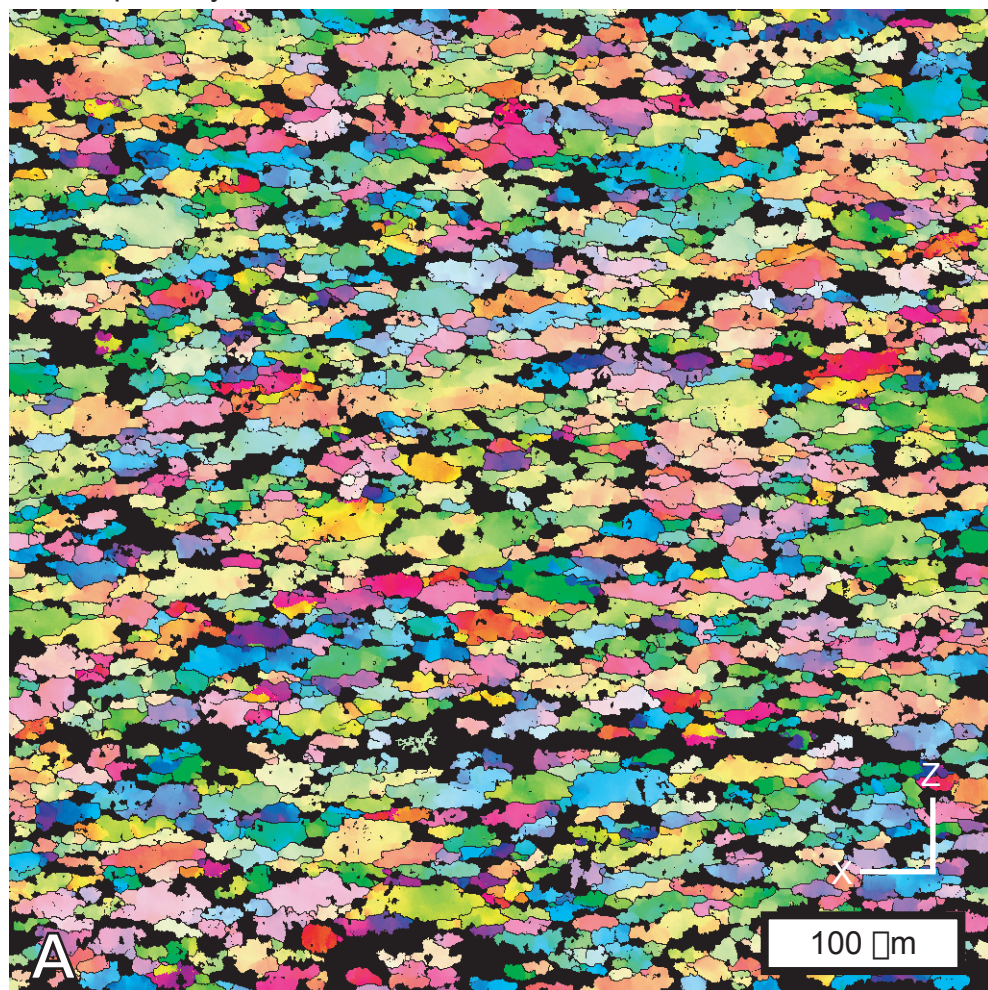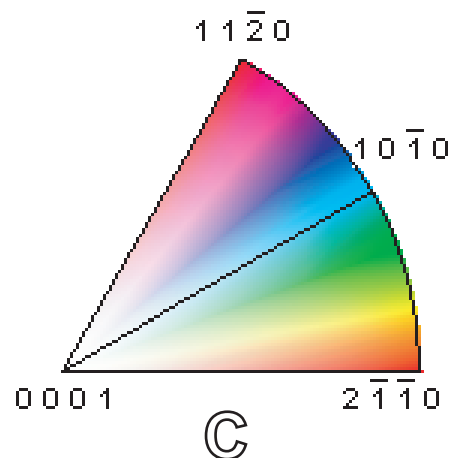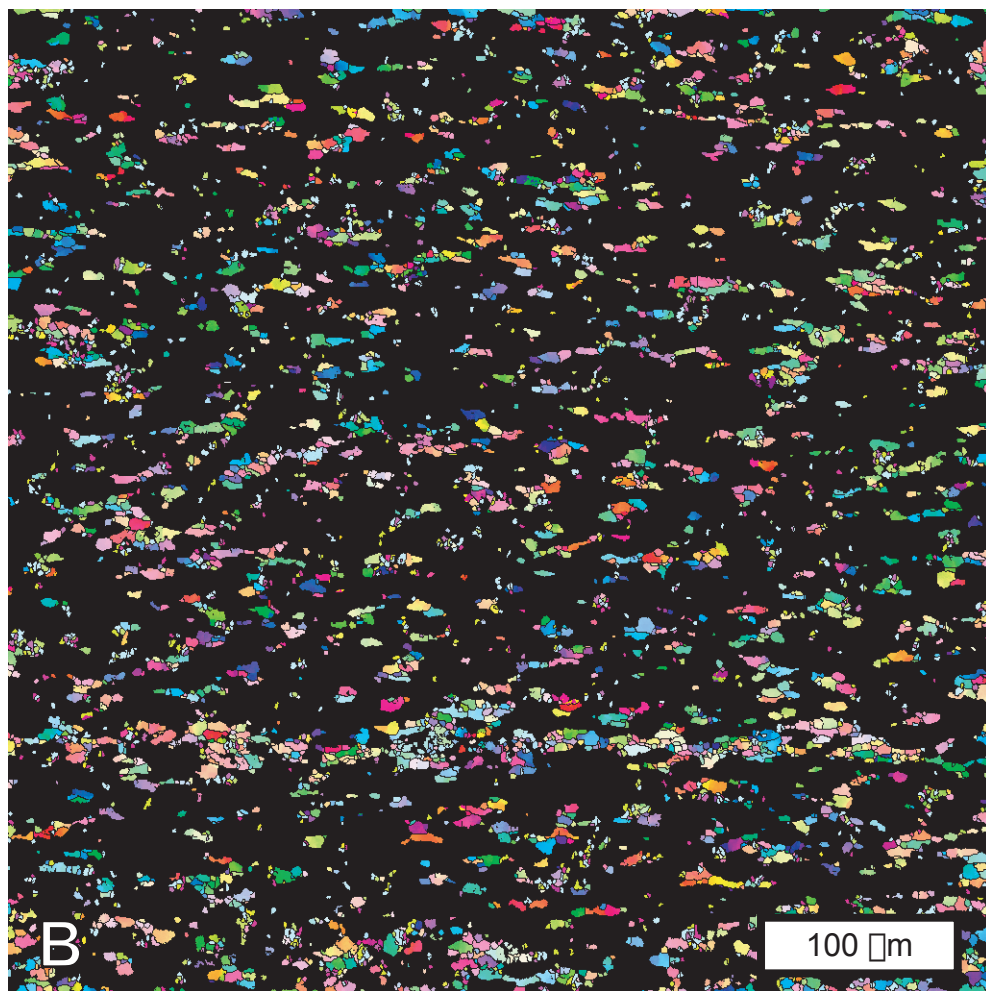

Appendix Figure DR3:  
EBSD derived grain maps of an area of 500 x 500  $\mu\text{m}$  with pixel size of 0.5  $\mu\text{m}$ . Crystal orientations are presented as an inverse pole figure map for the foliation normal, assuming hexagonal crystal symmetry. A: Grains with equivalent diameters > 10  $\mu\text{m}$ . B: Grains with equivalent diameters < 10  $\mu\text{m}$  (and > 1.3  $\mu\text{m}$  to eliminate artifacts of sampling). C: Color key.

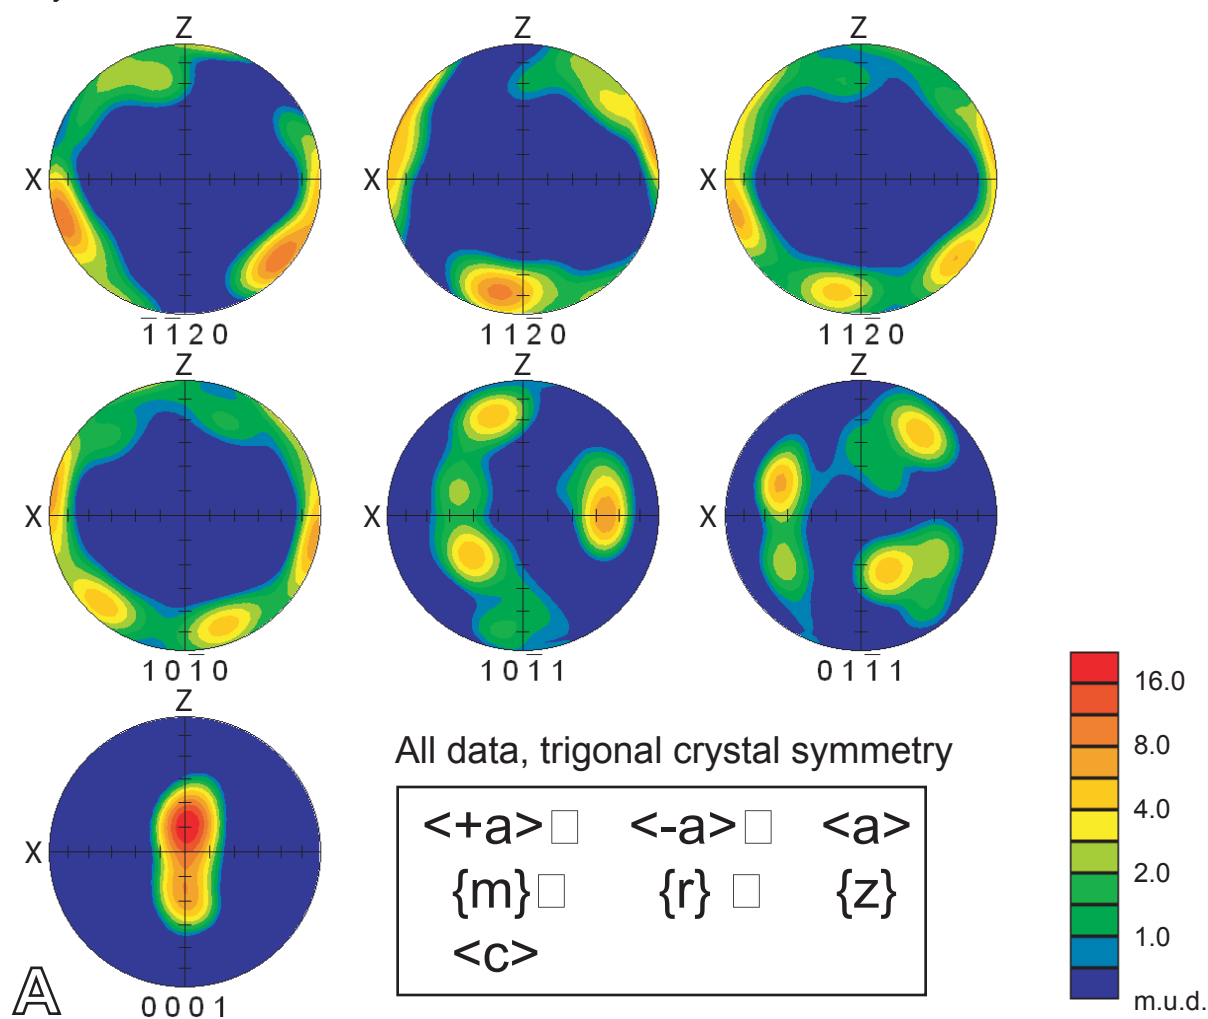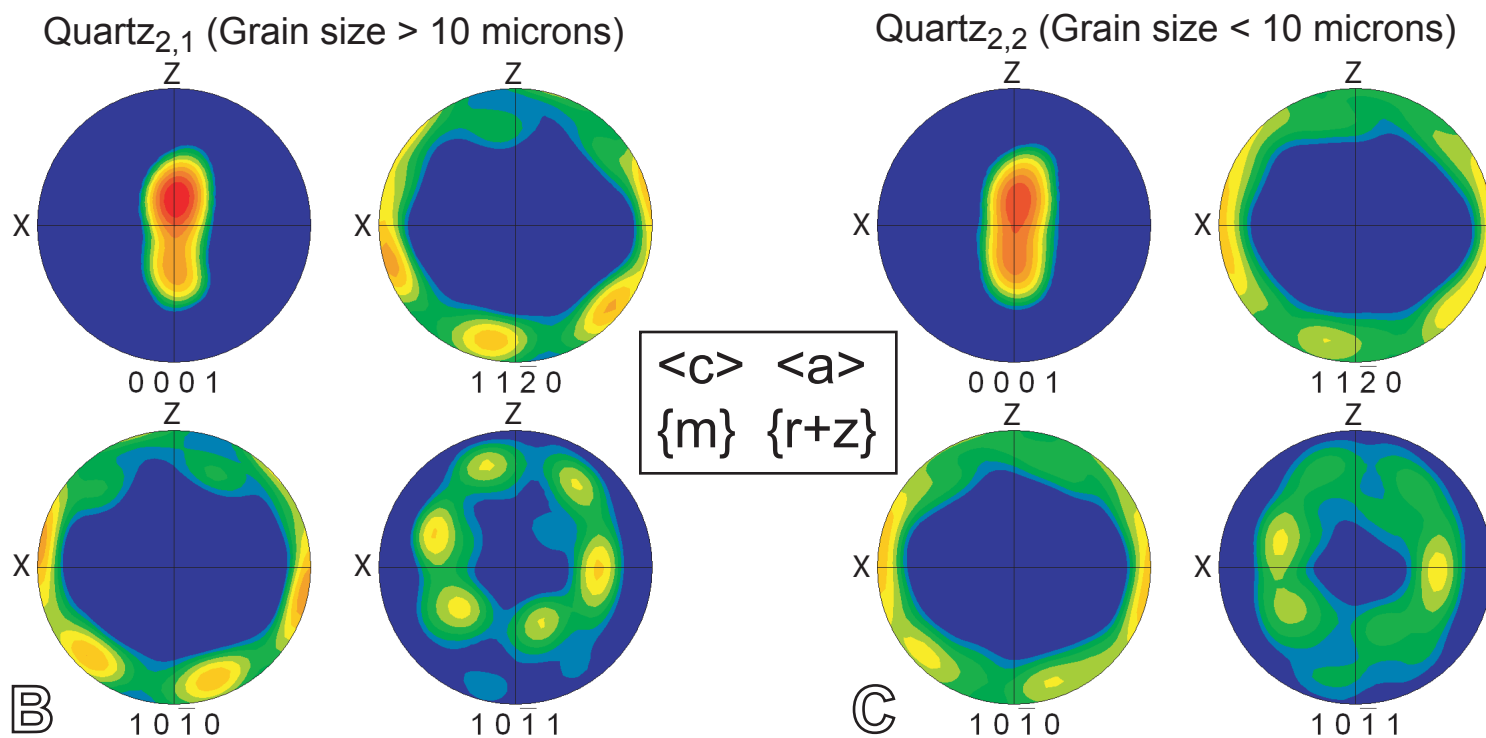

Appendix Figure DR4: Pole figures in equal area projection of upper hemisphere from EBSD-derived grain map (Figs. DR2, DR3). A: All data as measured with trigonal crystal symmetry. B, C: For large and small grain size, respectively, with hexagonal symmetry. Grain size discrimination was done with imposed hexagonal crystal symmetry to neglect Dauphiné twins.

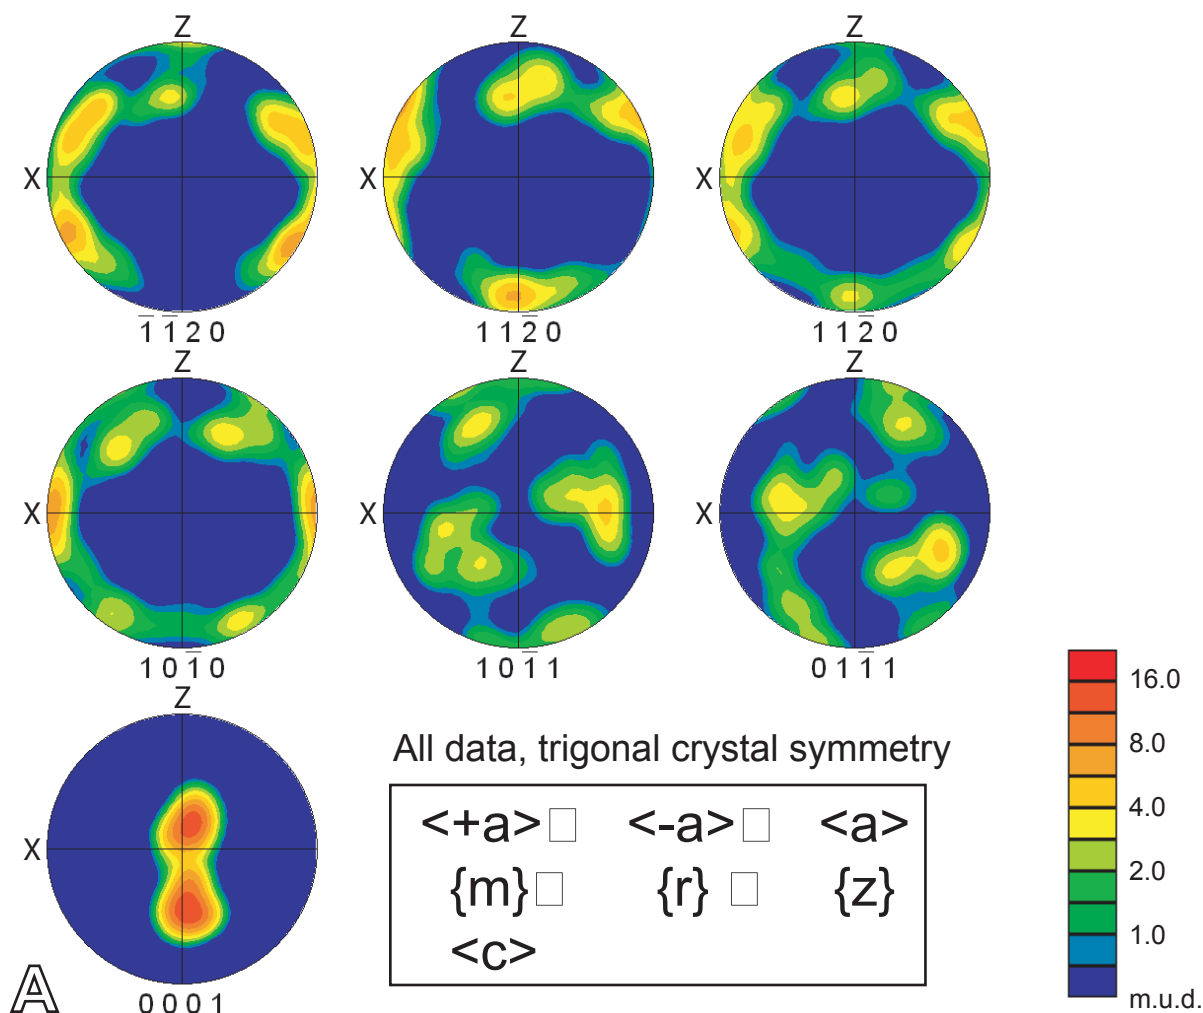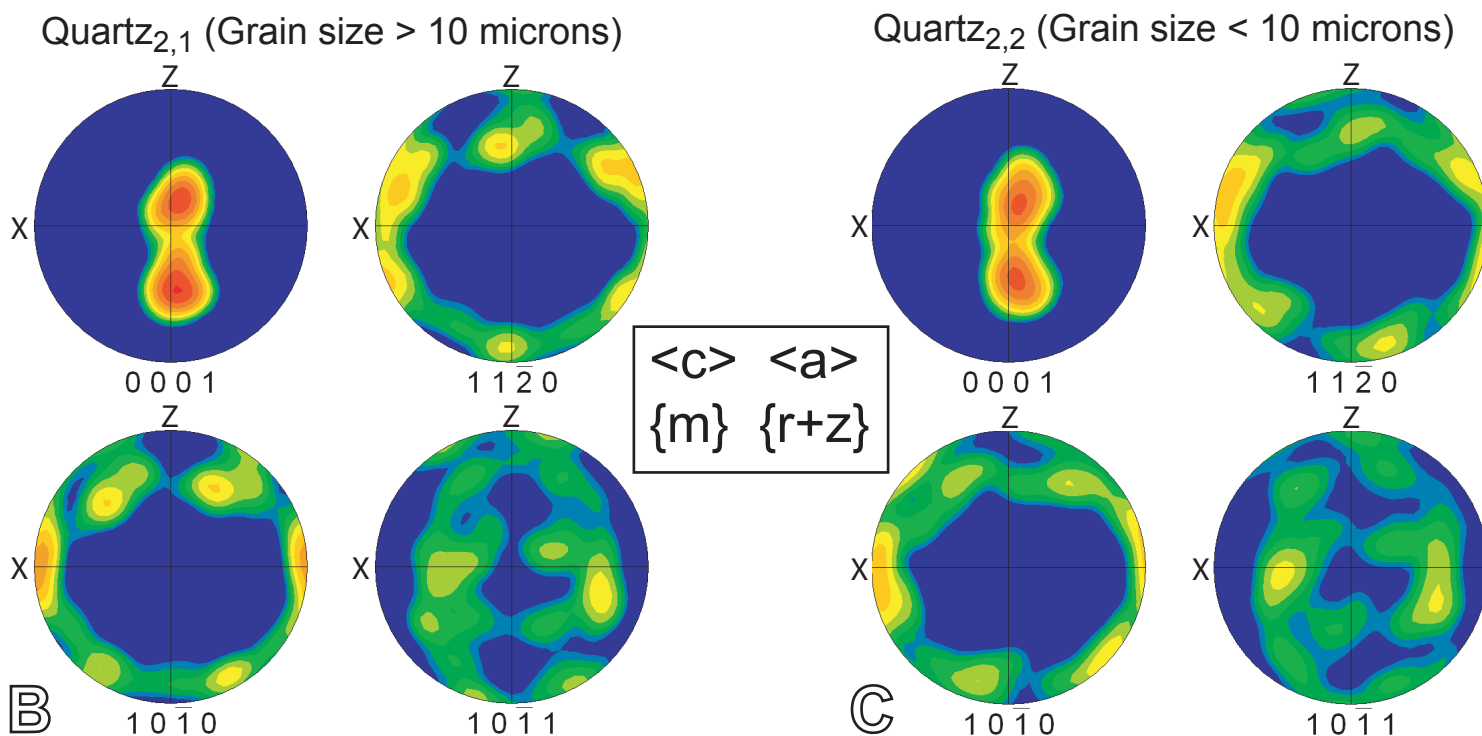

Appendix Figure DR5: Pole figures in equal area projection of upper hemisphere from EBSD derived grain map (Fig. 3). A: All data as measured with trigonal crystal symmetry. B, C: For large and small grain size, respectively, with hexagonal symmetry. Grain size discrimination was done with imposed hexagonal crystal symmetry to neglect Dauphiné twins.
